# Supplementary material for: Molecular and Functional Analysis of U-box E3 Ubiquitin Ligase Gene Family in Rice (Oryza sativa)
Source: MDPI journal article supplement (doi:10.3390/ijms222112088), 2021-11-08

**Supplementary Figure S1.** Validation of RNA-sequencing data by quantitative real-time PCR (qRT-PCR). Correlation of data between RNA-seq and qRT-PCR techniques on abiotic stress treatment (A) and biotic stress treatment (B).

A)

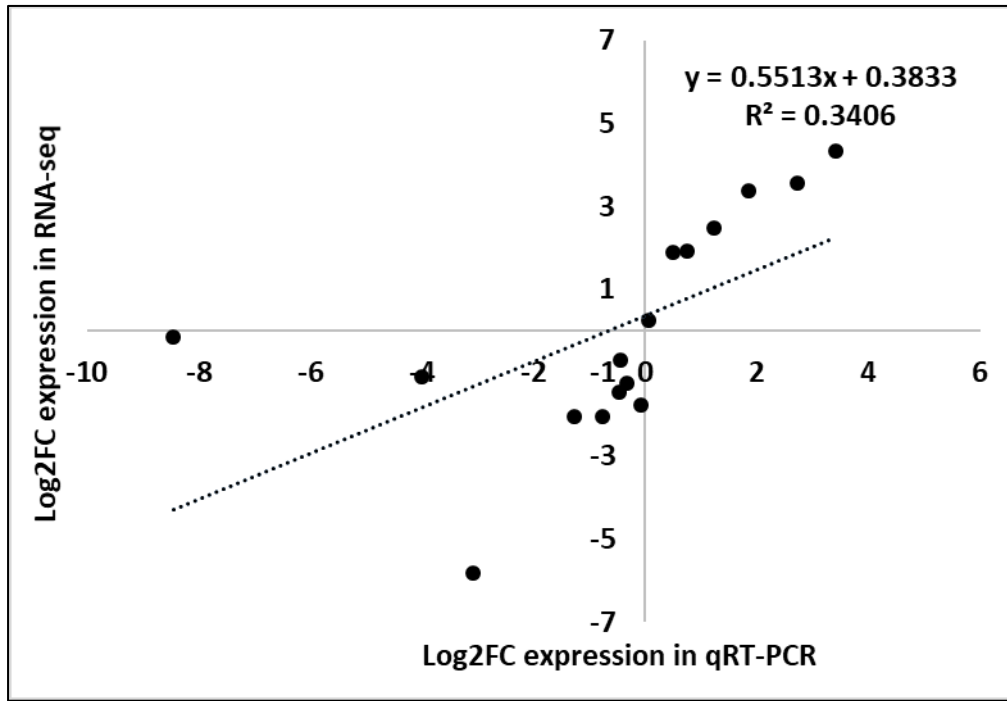

B)

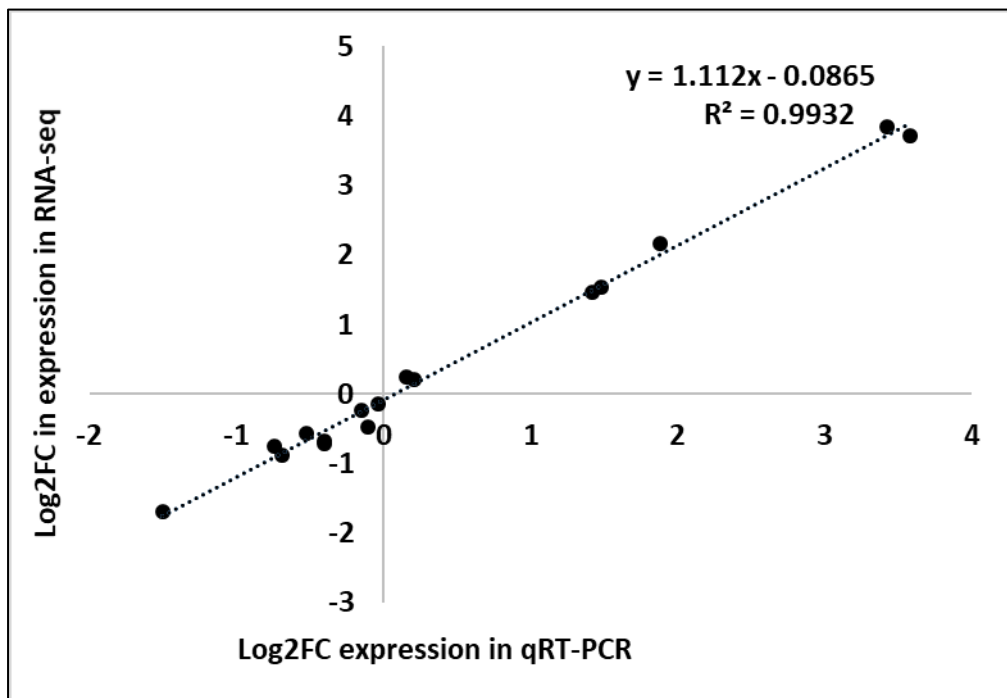

Supplement: s1 [file s1]
